# Supplementary material
Source: MDPI journal article supplement (https://www.mdpi.com/2071-1050/16/7/2756)
Supplement: s1 [file s1]

**Table S1.** Larval growth, survival, and sex of each *Neoleucopis* lineage (*N. kartliana* and *Neoleucopis* n. sp. B) designated to the eggs of the target (*M. hellenica*) or the non-target (*I. purchasi*) species.

| Collection date | Food source         | Lineage                     | Growth | Survival | Sex    |
|-----------------|---------------------|-----------------------------|--------|----------|--------|
| 10/5/2022       | <i>M. hellenica</i> | <i>Neoleucopis</i> n. sp. B | yes    | yes      | Female |
| 10/5/2022       | <i>M. hellenica</i> | <i>Neoleucopis</i> n. sp. B | yes    | yes      | Male   |
| 10/5/2022       | <i>M. hellenica</i> | <i>Neoleucopis</i> n. sp. B | yes    | yes      | Male   |
| 10/5/2022       | <i>M. hellenica</i> | <i>Neoleucopis</i> n. sp. B | yes    | yes      | Male   |
| 10/5/2022       | <i>M. hellenica</i> | <i>Neoleucopis</i> n. sp. B | yes    | yes      | Male   |
| 10/5/2022       | <i>M. hellenica</i> | <i>Neoleucopis</i> n. sp. B | yes    | yes      | Male   |
| 10/5/2022       | <i>M. hellenica</i> | <i>Neoleucopis</i> n. sp. B | yes    | yes      | Male   |
| 10/5/2022       | <i>M. hellenica</i> | <i>Neoleucopis</i> n. sp. B | yes    | yes      | Male   |
| 10/5/2022       | <i>M. hellenica</i> | <i>Neoleucopis</i> n. sp. B | yes    | yes      | Male   |
| 10/5/2022       | <i>M. hellenica</i> | <i>Neoleucopis</i> n. sp. B | yes    | yes      | Female |
| 10/5/2022       | <i>M. hellenica</i> | <i>Neoleucopis</i> n. sp. B | yes    | yes      | Male   |
| 10/5/2022       | <i>M. hellenica</i> | <i>Neoleucopis</i> n. sp. B | yes    | yes      | Male   |
| 10/5/2022       | <i>M. hellenica</i> | <i>Neoleucopis</i> n. sp. B | yes    | yes      | Female |
| 10/5/2022       | <i>M. hellenica</i> | <i>Neoleucopis</i> n. sp. B | yes    | yes      | Female |
| 10/5/2022       | <i>M. hellenica</i> | <i>Neoleucopis</i> n. sp. B | yes    | yes      | Male   |
| 10/5/2022       | <i>M. hellenica</i> | <i>Neoleucopis</i> n. sp. B | yes    | yes      | Male   |
| 10/5/2022       | <i>M. hellenica</i> | <i>Neoleucopis</i> n. sp. B | yes    | yes      | Female |
| 10/5/2022       | <i>M. hellenica</i> | <i>Neoleucopis</i> n. sp. B | yes    | yes      | Male   |
| 10/5/2022       | <i>M. hellenica</i> | <i>Neoleucopis</i> n. sp. B | yes    | yes      | Male   |
| 10/5/2022       | <i>M. hellenica</i> | <i>Neoleucopis</i> n. sp. B | yes    | yes      | Female |
| 10/5/2022       | <i>M. hellenica</i> | <i>Neoleucopis</i> n. sp. B | yes    | yes      | Female |
| 10/5/2022       | <i>I. purchasi</i>  | <i>Neoleucopis</i> n. sp. B | yes    | yes      | Male   |
| 10/5/2022       | <i>I. purchasi</i>  | <i>Neoleucopis</i> n. sp. B | yes    | no       |        |
| 10/5/2022       | <i>I. purchasi</i>  | <i>Neoleucopis</i> n. sp. B | yes    | no       |        |
| 10/5/2022       | <i>I. purchasi</i>  | <i>Neoleucopis</i> n. sp. B | yes    | no       |        |
| 10/5/2022       | <i>I. purchasi</i>  | <i>Neoleucopis</i> n. sp. B | yes    | yes      | Male   |
| 10/5/2022       | <i>I. purchasi</i>  | <i>Neoleucopis</i> n. sp. B | yes    | no       |        |
| 10/5/2022       | <i>I. purchasi</i>  | <i>Neoleucopis</i> n. sp. B | yes    | no       |        |
| 10/5/2022       | <i>I. purchasi</i>  | <i>Neoleucopis</i> n. sp. B | yes    | no       |        |
| 10/5/2022       | <i>I. purchasi</i>  | <i>Neoleucopis</i> n. sp. B | yes    | no       |        |
| 10/5/2022       | <i>I. purchasi</i>  | <i>Neoleucopis</i> n. sp. B | yes    | no       |        |
| 10/5/2022       | <i>I. purchasi</i>  | <i>Neoleucopis</i> n. sp. B | yes    | no       |        |
| 10/5/2022       | <i>I. purchasi</i>  | <i>Neoleucopis</i> n. sp. B | yes    | no       |        |
| 10/5/2022       | <i>I. purchasi</i>  | <i>Neoleucopis</i> n. sp. B | yes    | no       |        |
| 10/5/2022       | <i>I. purchasi</i>  | <i>Neoleucopis</i> n. sp. B | yes    | no       |        |
| 10/5/2022       | <i>I. purchasi</i>  | <i>Neoleucopis</i> n. sp. B | yes    | no       |        |
| 10/5/2022       | <i>I. purchasi</i>  | <i>Neoleucopis</i> n. sp. B | yes    | yes      | Female |
| 10/5/2022       | <i>I. purchasi</i>  | <i>Neoleucopis</i> n. sp. B | yes    | no       |        |
| 10/5/2022       | <i>I. purchasi</i>  | <i>N. kartliana</i>         | yes    | yes      | Male   |
| 10/5/2022       | <i>I. purchasi</i>  | <i>N. kartliana</i>         | yes    | yes      | Male   |
| 10/5/2022       | <i>I. purchasi</i>  | <i>N. kartliana</i>         | yes    | yes      | Male   |
| 14/4/2023       | <i>M. hellenica</i> | <i>N. kartliana</i>         | yes    | yes      | Male   |
| 14/4/2023       | <i>M. hellenica</i> | <i>N. kartliana</i>         | yes    | yes      | Female |
| 14/4/2023       | <i>M. hellenica</i> | <i>N. kartliana</i>         | yes    | yes      | Male   |
| 14/4/2023       | <i>M. hellenica</i> | <i>N. kartliana</i>         | yes    | yes      | Female |

|           |                     |                     |     |     |        |
|-----------|---------------------|---------------------|-----|-----|--------|
| 14/4/2023 | <i>M. hellenica</i> | <i>N. kartliana</i> | yes | yes | Female |
| 14/4/2023 | <i>M. hellenica</i> | <i>N. kartliana</i> | yes | yes | Female |
| 14/4/2023 | <i>M. hellenica</i> | <i>N. kartliana</i> | yes | yes | Female |
| 14/4/2023 | <i>M. hellenica</i> | <i>N. kartliana</i> | yes | yes | Female |
| 14/4/2023 | <i>M. hellenica</i> | <i>N. kartliana</i> | yes | yes | Female |
| 14/4/2023 | <i>M. hellenica</i> | <i>N. kartliana</i> | yes | yes | Female |
| 14/4/2023 | <i>M. hellenica</i> | <i>N. kartliana</i> | yes | yes | Female |
| 14/4/2023 | <i>M. hellenica</i> | <i>N. kartliana</i> | yes | yes | Male   |
| 14/4/2023 | <i>M. hellenica</i> | <i>N. kartliana</i> | no  | yes | Female |
| 14/4/2023 | <i>M. hellenica</i> | <i>N. kartliana</i> | yes | yes | Female |
| 14/4/2023 | <i>M. hellenica</i> | <i>N. kartliana</i> | yes | yes | Female |
| 14/4/2023 | <i>M. hellenica</i> | <i>N. kartliana</i> | yes | yes | Female |
| 14/4/2023 | <i>M. hellenica</i> | <i>N. kartliana</i> | yes | yes | Male   |
| 14/4/2023 | <i>M. hellenica</i> | <i>N. kartliana</i> | yes | yes | Male   |
| 14/4/2023 | <i>M. hellenica</i> | <i>N. kartliana</i> | no  | yes | Male   |
| 14/4/2023 | <i>M. hellenica</i> | <i>N. kartliana</i> | no  | yes | Female |
| 14/4/2023 | <i>I. purchasi</i>  | <i>N. kartliana</i> | no  | no  |        |
| 14/4/2023 | <i>I. purchasi</i>  | <i>N. kartliana</i> | yes | no  |        |
| 14/4/2023 | <i>I. purchasi</i>  | <i>N. kartliana</i> | no  | no  |        |
| 14/4/2023 | <i>I. purchasi</i>  | <i>N. kartliana</i> | no  | no  |        |
| 14/4/2023 | <i>I. purchasi</i>  | <i>N. kartliana</i> | no  | yes | Male   |
| 14/4/2023 | <i>I. purchasi</i>  | <i>N. kartliana</i> | no  | no  |        |
| 14/4/2023 | <i>I. purchasi</i>  | <i>N. kartliana</i> | no  | no  |        |
| 14/4/2023 | <i>I. purchasi</i>  | <i>N. kartliana</i> | no  | no  |        |
| 14/4/2023 | <i>I. purchasi</i>  | <i>N. kartliana</i> | no  | no  |        |
| 14/4/2023 | <i>I. purchasi</i>  | <i>N. kartliana</i> | yes | no  |        |
| 14/4/2023 | <i>I. purchasi</i>  | <i>N. kartliana</i> | no  | yes | Male   |
| 14/4/2023 | <i>I. purchasi</i>  | <i>N. kartliana</i> | no  | no  |        |
| 14/4/2023 | <i>I. purchasi</i>  | <i>N. kartliana</i> | no  | no  |        |
| 14/4/2023 | <i>I. purchasi</i>  | <i>N. kartliana</i> | no  | no  |        |
| 14/4/2023 | <i>I. purchasi</i>  | <i>N. kartliana</i> | no  | no  |        |
| 14/4/2023 | <i>I. purchasi</i>  | <i>N. kartliana</i> | no  | no  |        |
| 14/4/2023 | <i>I. purchasi</i>  | <i>N. kartliana</i> | no  | no  |        |
| 14/4/2023 | <i>I. purchasi</i>  | <i>N. kartliana</i> | no  | no  |        |
| 14/4/2023 | <i>I. purchasi</i>  | <i>N. kartliana</i> | no  | no  |        |
| 14/4/2023 | <i>I. purchasi</i>  | <i>N. kartliana</i> | no  | yes | Male   |
| 14/4/2023 | <i>I. purchasi</i>  | <i>N. kartliana</i> | yes | no  |        |
| 14/4/2023 | <i>I. purchasi</i>  | <i>N. kartliana</i> | no  | no  |        |

---

**Table S2.** Total number of *Neoleucopis* spp. larvae encountered on branch samples infested by the non-target (*I. purchasi*) and target species (*M. hellenica*) collected on two occasions in 2022.

| Collection date | Plant host species        | Scale insect species        | Total number of scale ovisacs | Total number of <i>Neoleucopis</i> spp. larvae |
|-----------------|---------------------------|-----------------------------|-------------------------------|------------------------------------------------|
| 13/4/2022       | <i>Pittosporum tobira</i> | <i>Icerya purchasi</i>      | 30                            | 0                                              |
| 13/4/2022       | <i>Pinus brutia</i>       | <i>Marchalina hellenica</i> | 9                             | 11                                             |
| 10/5/2022       | <i>Pittosporum tobira</i> | <i>Icerya purchasi</i>      | 59                            | 0                                              |
| 10/5/2022       | <i>Pinus brutia</i>       | <i>Marchalina hellenica</i> | 15                            | 14                                             |

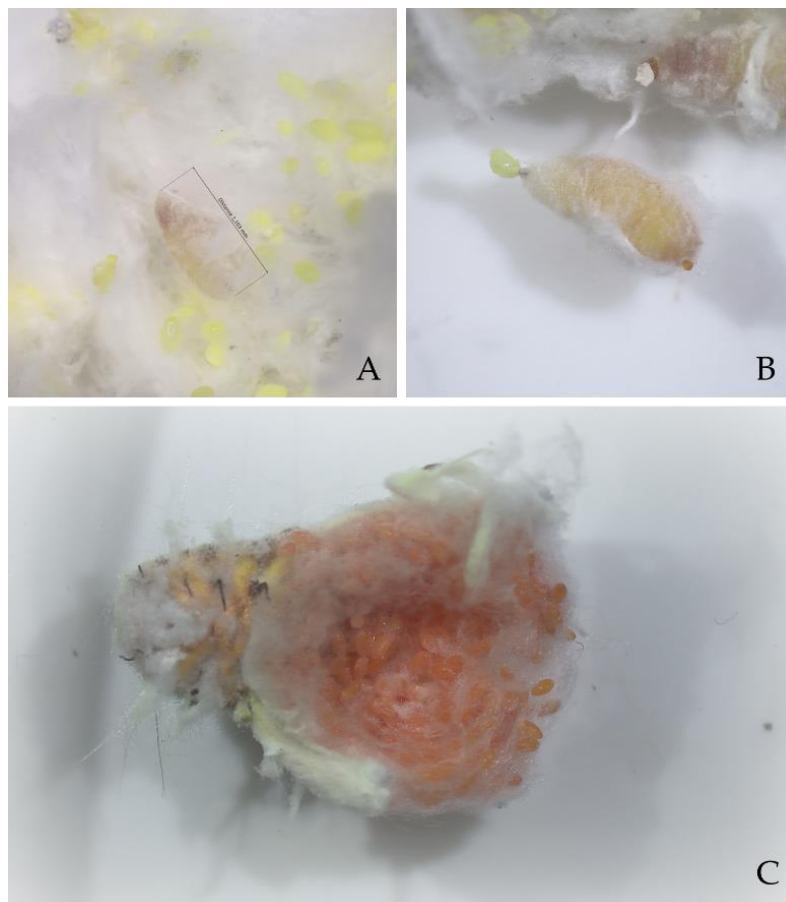

**Figure S1.** *Neoleucopis* spp. larvae encountered in *Marchalina hellenica* ovisacs (A) observed preying on the scale's eggs (B), and the absence of larvae in *Icerya purchasi* ovisacs (C).
